# Supplementary material for: Added Sugar, Sugar-Sweetened Beverages, and Artificially Sweetened Beverages and Risk of Cardiovascular Disease: Findings from the Women’s Health Initiative and a Network Meta-Analysis of Prospective Studies
Source: MDPI journal article supplement (doi:10.3390/nu14204226), 2022-10-11
Supplement: s1 [file s1]

## Supplementary Materials

### Table of Contents

|                                                                                                                                                                                                                        |    |
|------------------------------------------------------------------------------------------------------------------------------------------------------------------------------------------------------------------------|----|
| Table S1 Search terms and strategy for the systematic review and meta-analysis .....                                                                                                                                   | 3  |
| Table S2 Subgroup Analyses for Added Sugars and Total SSBs and CVD outcomes by baseline BMI category among 109,445 Participants in the Women's Health Initiative (CT+OS) (1993-2021) .....                             | 4  |
| Table S3 Subgroup Analyses for ASB servings and CVD outcomes by baseline BMI category among 52,754 Participants in the Women's Health Initiative (OS) (1993-2021) .....                                                | 7  |
| Table S4 Subgroup Analyses for Added Sugars and Total SSBs and CVD outcomes by baseline physical activity among 109,445 Participants in the Women's Health Initiative (CT+OS) (1993-2021) .....                        | 9  |
| Table S5 Subgroup Analyses for ASB servings and CVD outcomes by baseline physical activity among 52,754 Participants in the Women's Health Initiative (OS) (1993-2021) .....                                           | 12 |
| Table S6 Sensitivity Analyses for Added Sugars and Total SSBs and Total Cardiovascular Disease, Coronary Heart Disease and Heart Failure among Participants in the Women's Health Initiative (CT+OS) (1993-2021) ..... | 14 |
| Table S7 Sensitivity Analyses for Added Sugars and Total SSBs and Total Stroke and Stroke Subtypes among Participants in the Women's Health Initiative (CT+OS) (1993-2021) .....                                       | 16 |
| Table S8 Sensitivity analyses for ASBs with Risk of Cardiovascular Disease Outcomes among 52,754 Participants in the Women's Health Initiative (OS) (1993-2021) .....                                                  | 18 |
| Table S9 Characteristics of included studies for the systematic review and meta-analysis.....                                                                                                                          | 20 |
| Table S10 Quality of included studies assessed by NOS scale and AHRQ standards.....                                                                                                                                    | 22 |
| Table S11 Subgroup analyses for added Sugar, SSB, ASB, and cardiovascular outcomes by sex category in the random effects network meta-analysis.....                                                                    | 23 |
| Table S12 Sensitivity analyses for added Sugar, SSB, ASB, and cardiovascular outcomes in the random effects network meta-analysis.....                                                                                 | 24 |

|                                                                            |    |
|----------------------------------------------------------------------------|----|
| Figure S1 Flow chart for the literature search.....                        | 26 |
| Figure S2 Plot of the added sugar, ASB, SSB, and CVD outcomes network..... | 27 |

**Table S1. Search terms and strategy for the systematic review and meta-analysis**

|                                                                                                                                                                                                                                                                                                                                                                                                                                                                                                                                                                                                                                                                                                                                                                                                                                                                                                                                                                                                                                                                                                                                                                 |
|-----------------------------------------------------------------------------------------------------------------------------------------------------------------------------------------------------------------------------------------------------------------------------------------------------------------------------------------------------------------------------------------------------------------------------------------------------------------------------------------------------------------------------------------------------------------------------------------------------------------------------------------------------------------------------------------------------------------------------------------------------------------------------------------------------------------------------------------------------------------------------------------------------------------------------------------------------------------------------------------------------------------------------------------------------------------------------------------------------------------------------------------------------------------|
| <p><b>Search terms:</b></p> <p>[added sugar or free sugar] OR [sugar-sweetened drink* or sugar sweetened beverage* or SSB or soft drink* or fruit drink* or soda] OR [artificially sweeten* or ASB or diet drink* or diet soft drink* or diet coke or diet coda or low calorie soda] AND [prospective or cohort* or longitudinal or follow-up] AND [inciden* or mortality or CVD or CHD or cardiovascular disease or cardiovascular mortality or cardiovascular death or cerebrovascular disease or coronary heart disease or coronary artery disease or stroke or ischemic stroke or haemorrhagic stroke or hemorrhagic stroke or myocardial infarction or ischemic heart diseases]</p>                                                                                                                                                                                                                                                                                                                                                                                                                                                                        |
| <p><b>Databases:</b></p> <p>Embase 1910 to Present,<br/>Ovid Emcare 1995 to 2021 Week 5,<br/>Ovid MEDLINE(R) and Epub Ahead of Print, In-Process &amp; Other Non-Indexed Citations 1946 to February 09, 2021</p>                                                                                                                                                                                                                                                                                                                                                                                                                                                                                                                                                                                                                                                                                                                                                                                                                                                                                                                                                |
| <p><b>Inclusion criteria:</b></p> <ol style="list-style-type: none"> <li>1. All human participants;</li> <li>2. Prospective cohort studies that examined the association between added sugar, SSB or ASB and cardiovascular outcomes;</li> <li>3. The exposure interest was the dietary intake of added sugar, SSB or ASB;</li> <li>4. Outcome: The outcomes were defined as coronary heart disease (defined as non-fatal myocardial infarction, angina, coronary revascularization (i.e., percutaneous transluminal coronary angioplasty or coronary artery bypass surgery, or coronary heart disease death), stroke (defined as fatal or nonfatal stroke), and composite cardiovascular disease (comprised of coronary heart disease and stroke). Outcomes were defined and diagnosed according to self-reported, medical record or clinical examination.</li> </ol> <p><b>Exclusion criteria:</b></p> <ol style="list-style-type: none"> <li>1. Intervention studies, review papers, comment, letters, news, notes, protocols, papers or abstracts from conference proceedings.</li> <li>2. Articles without an abstract or full text in English.</li> </ol> |

**Table S2. Subgroup Analyses for Added Sugars and Total SSBs and CVD outcomes by baseline BMI category among 109,034 Participants in the Women's Health Initiative (CT+OS) (1993-2021)**

| BMI category                         |                                     |                                           |                                    |                   |
|--------------------------------------|-------------------------------------|-------------------------------------------|------------------------------------|-------------------|
| HR (95% CIs)                         | <25 kg/m <sup>2</sup><br>(n=34,280) | 25 to <30 kg/m <sup>2</sup><br>(n=32,394) | ≥30kg/m <sup>2</sup><br>(n=25,093) | P for interaction |
| <b><i>TOTAL CARDIOVASCULAR</i></b>   |                                     |                                           |                                    |                   |
| Added sugars, % EAS                  |                                     |                                           |                                    | 0.29              |
| <10%                                 | 1.00 [reference]                    | 1.00 [reference]                          | 1.00 [reference]                   |                   |
| 10-14.9%                             | 1.07 (0.98, 1.16)                   | 0.98 (0.90, 1.06)                         | 0.99 (0.92, 1.08)                  |                   |
| ≥15.0%                               | 1.18 (1.06, 1.32)                   | 1.06 (0.95, 1.17)                         | 1.05 (0.94, 1.17)                  |                   |
| Total SSBs, servings                 |                                     |                                           |                                    | 0.65              |
| <1/week                              | 1.00 [reference]                    | 1.00 [reference]                          | 1.00 [reference]                   |                   |
| 1/ week to <1 day                    | 0.93 (0.86, 1.01)                   | 0.96 (0.89, 1.03)                         | 0.92 (0.86, 1.00)                  |                   |
| ≥ 1 serving/day                      | 1.19 (0.99, 1.42)                   | 1.17 (1.00, 1.37)                         | 1.06 (0.91, 1.23)                  |                   |
| <b><i>CORONARY HEART DISEASE</i></b> |                                     |                                           |                                    |                   |
| Added sugars, % EAS                  |                                     |                                           |                                    | 0.01              |
| <10%                                 | 1.00 [reference]                    | 1.00 [reference]                          | 1.00 [reference]                   |                   |
| 10-14.9%                             | 1.03 (0.90, 1.18)                   | 0.94 (0.84, 1.07)                         | 1.08 (0.95, 1.23)                  |                   |
| ≥15.0%                               | 1.39 (1.17, 1.65)                   | 1.07 (0.91, 1.23)                         | 1.22 (1.03, 1.44)                  |                   |
| Total SSBs, servings                 |                                     |                                           |                                    | 0.63              |
| <1/week                              | 1.00 [reference]                    | 1.00 [reference]                          | 1.00 [reference]                   |                   |
| 1/ week to <1 day                    | 0.91 (0.80, 1.03)                   | 0.92 (0.82, 1.03)                         | 0.91 (0.81, 1.03)                  |                   |
| ≥ 1 serving/day                      | 1.27 (0.97, 1.67)                   | 1.20 (0.94, 1.53)                         | 1.09 (0.85, 1.38)                  |                   |
| <b><i>HEART FAILURE</i></b>          |                                     |                                           |                                    |                   |

|                               |                   |                   |                   |
|-------------------------------|-------------------|-------------------|-------------------|
| <b>Added sugars, % EAS</b>    |                   |                   | 0.12              |
| <10%                          | 1.00 [reference]  | 1.00 [reference]  | 1.00 [reference]  |
| 10-14.9%                      | 1.01 (0.78, 1.30) | 0.92 (0.73, 1.18) | 0.95 (0.77, 1.17) |
| ≥15.0%                        | 1.27 (0.91, 1.75) | 0.82 (0.59, 1.16) | 0.98 (0.74, 1.29) |
| <b>Total SSBs, servings</b>   |                   |                   | 0.89              |
| <1/week                       | 1.00 [reference]  | 1.00 [reference]  | 1.00 [reference]  |
| 1/ week to <1 day             | 1.06 (0.83, 1.35) | 1.08 (0.85, 1.37) | 0.96 (0.79, 1.18) |
| ≥ 1 serving/day               | 1.39 (0.82, 2.32) | 1.23 (0.73, 2.06) | 1.35 (0.93, 1.97) |
| <b><i>TOTAL STROKE</i></b>    |                   |                   |                   |
| <b>Added sugars, % EAS</b>    |                   |                   | 0.23              |
| <10%                          | 1.00 [reference]  | 1.00 [reference]  | 1.00 [reference]  |
| 10-14.9%                      | 1.04 (0.91, 1.19) | 0.93 (0.82, 1.06) | 0.97 (0.84, 1.11) |
| ≥15.0%                        | 0.99 (0.81, 1.19) | 1.08 (0.91, 1.28) | 0.92 (0.77, 1.12) |
| <b>Total SSBs, servings</b>   |                   |                   | 0.63              |
| <1/week                       | 1.00 [reference]  | 1.00 [reference]  | 1.00 [reference]  |
| 1/ week to <1 day             | 0.92 (0.80, 1.05) | 0.96 (0.84, 1.08) | 0.91 (0.80, 1.05) |
| ≥ 1 serving/day               | 1.18 (0.88, 1.59) | 1.13 (0.87, 1.46) | 0.90 (0.69, 1.19) |
| <b><i>ISCHEMIC STROKE</i></b> |                   |                   |                   |
| <b>Added sugars, % EAS</b>    |                   |                   | 0.60              |
| <10%                          | 1.00 [reference]  | 1.00 [reference]  | 1.00 [reference]  |
| 10-14.9%                      | 1.01 (0.86, 1.19) | 0.86 (0.74, 1.00) | 0.87 (0.74, 1.03) |
| ≥15.0%                        | 0.93 (0.74, 1.16) | 1.02 (0.84, 1.23) | 0.90 (0.73, 1.12) |
| <b>Total SSBs, servings</b>   |                   |                   | 0.62              |
| <1/week                       | 1.00 [reference]  | 1.00 [reference]  | 1.00 [reference]  |

|                             |                   |                   |                   |
|-----------------------------|-------------------|-------------------|-------------------|
| 1/ week to <1 day           | 0.91 (0.78, 1.06) | 0.99 (0.85, 1.14) | 0.92 (0.79, 1.08) |
| ≥ 1 serving/day             | 1.18 (0.83, 1.67) | 1.21 (0.90, 1.64) | 0.89 (0.65, 1.22) |
| <b>HEMORRHAGIC STROKE</b>   |                   |                   |                   |
| <b>Added sugars, % EAS</b>  | <b>0.03</b>       |                   |                   |
| <10%                        | 1.00 [reference]  | 1.00 [reference]  | 1.00 [reference]  |
| 10-14.9%                    | 1.04 (0.76, 1.42) | 1.37 (0.96, 1.95) | 1.45 (0.98, 2.15) |
| ≥15.0%                      | 0.97 (0.62, 1.52) | 1.64 (1.06, 2.54) | 1.20 (0.70, 2.03) |
| <b>Total SSBs, servings</b> | <b>0.43</b>       |                   |                   |
| <1/week                     | 1.00 [reference]  | 1.00 [reference]  | 1.00 [reference]  |
| 1/ week to <1 day           | 0.82 (0.60, 1.11) | 1.13 (0.81, 1.59) | 0.96 (0.66, 1.39) |
| ≥ 1 serving/day             | 1.22 (0.62, 2.42) | 1.20 (0.62, 2.36) | 1.19 (0.59, 2.41) |

Abbreviations: CT=clinical trial; %EAS=percent energy from added sugar; HR, hazard ratio; OS=observational study; SSB=sugar sweetened beverages. Under/over energy reporters and those with baseline CVD, diabetes and cancer were excluded from the analysis.

\*Model 1 adjusted for age, region, smoking, study arm, ethnicity, education, marital status, BMI, physical activity, alcohol intake, energy intake, hypertension status, family history of CVD, family history of diabetes, hormone therapy use, cholesterol-lowering medication use, total protein intake, saturated fat intake, trans fat intake, fiber intake

**Table S3. Subgroup Analyses for ASB servings and CVD outcomes by baseline BMI category among 52,754 Participants in the Women's Health Initiative (OS) (1993-2021)**

| HR (95% CIs)                               | BMI category                        |                                           |                                   | P for interaction |
|--------------------------------------------|-------------------------------------|-------------------------------------------|-----------------------------------|-------------------|
|                                            | <25 kg/m <sup>2</sup><br>(n=20,631) | 25 to <30 kg/m <sup>2</sup><br>(n=15,888) | ≥30kg/m <sup>2</sup><br>(n=9,742) |                   |
| <b><i>TOTAL CARDIOVASCULAR DISEASE</i></b> |                                     |                                           |                                   | 0.52              |
| <1/week                                    | 1.00 [reference]                    | 1.00 [reference]                          | 1.00 [reference]                  |                   |
| 1/ week to <1 day                          | 0.98 (0.85, 1.14)                   | 0.87 (0.77, 0.99)                         | 1.09 (0.95, 1.26)                 |                   |
| ≥ 1 serving/day                            | 1.20 (0.98, 1.47)                   | 1.09 (0.92, 1.28)                         | 1.18 (1.00, 1.40)                 |                   |
| <b><i>CORONARY HEART DISEASE</i></b>       |                                     |                                           |                                   | 0.99              |
| <1/week                                    | 1.00 [reference]                    | 1.00 [reference]                          | 1.00 [reference]                  |                   |
| 1/ week to <1 day                          | 0.98 (0.78, 1.23)                   | 0.92 (0.75, 1.14)                         | 1.02 (0.81, 1.29)                 |                   |
| ≥ 1 serving/day                            | 1.11 (0.79, 1.55)                   | 1.14 (0.87, 1.48)                         | 1.12 (0.85, 1.47)                 |                   |
| <b><i>HEART FAILURE</i></b>                |                                     |                                           |                                   | 0.54              |
| <1/week                                    | 1.00 [reference]                    | 1.00 [reference]                          | 1.00 [reference]                  |                   |
| 1/ week to <1 day                          | 0.71 (0.45, 1.12)                   | 0.90 (0.61, 1.32)                         | 1.13 (0.81, 1.59)                 |                   |
| ≥ 1 serving/day                            | 0.92 (0.50, 1.72)                   | 0.89 (0.51, 1.56)                         | 1.18 (0.79, 1.76)                 |                   |
| <b><i>TOTAL STROKE</i></b>                 |                                     |                                           |                                   | 0.06              |
| <1/week                                    | 1.00 [reference]                    | 1.00 [reference]                          | 1.00 [reference]                  |                   |
| 1/ week to <1 day                          | 1.02 (0.80, 1.30)                   | 0.84 (0.67, 1.05)                         | 1.19 (0.91, 1.55)                 |                   |
| ≥ 1 serving/day                            | 1.46 (1.06, 2.03)                   | 0.96 (0.72, 1.30)                         | 1.43 (1.06, 1.92)                 |                   |
| <b><i>ISCHEMIC STROKE</i></b>              |                                     |                                           |                                   | 0.02              |
| <1/week                                    | 1.00 [reference]                    | 1.00 [reference]                          | 1.00 [reference]                  |                   |
| 1/ week to <1 day                          | 0.98 (0.74, 1.30)                   | 0.79 (0.62, 1.02)                         | 1.36 (1.01, 1.83)                 |                   |

|                           |                   |                   |                   |
|---------------------------|-------------------|-------------------|-------------------|
| ≥ 1 serving/day           | 1.39 (0.95, 2.04) | 0.84 (0.59, 1.19) | 1.50 (1.07, 2.10) |
| <b>HEMORRHAGIC STROKE</b> |                   |                   | 0.68              |
| <1/week                   | 1.00 [reference]  | 1.00 [reference]  | 1.00 [reference]  |
| 1/ week to <1 day         | 1.24 (0.73, 2.11) | 1.06 (0.61, 1.84) | 0.84 (0.37, 1.92) |
| ≥ 1 serving/day           | 1.41 (0.67, 3.00) | 0.99 (0.46, 2.11) | 1.49 (0.66, 3.35) |

Abbreviations: ASBs, artificially sweetened beverages; HR, hazard ratio; OS=observational study. Under/over energy reporters and those with baseline CVD, diabetes and cancer were excluded from the analysis. Total CVD is a composite of incidence and death of CHD, stroke, heart failure and coronary revascularization (CABG or PTCA).

\*Model adjusted for age, region, smoking, ethnicity, education, marital status, BMI, physical activity, alcohol intake, energy intake, hypertension status, family history of CVD, family history of diabetes, hormone therapy use, cholesterol-lowering medication use, total protein intake, saturated fat intake, trans fat intake, fiber intake



**Table S4. Subgroup Analyses for Added Sugars and Total SSBs and CVD outcomes by baseline physical activity among 109,034 Participants in the Women's Health Initiative (CT+OS) (1993-2021)**

|                                      | Physical activity category                   |                                               |               |
|--------------------------------------|----------------------------------------------|-----------------------------------------------|---------------|
| HR (95% CIs)                         | ≤median<br>(8.75 MET-hours/wk)<br>(n=51,635) | >median<br>(8.75 MET-hours/wk)<br>(n=57, 399) | P interaction |
| <i><b>TOTAL CARDIOVASCULAR</b></i>   |                                              |                                               |               |
| Added sugars, % EAS                  |                                              |                                               | 0.68          |
| <10%                                 | 1.00 [reference]                             | 1.00 [reference]                              |               |
| 10-14.9%                             | 1.01 (0.95, 1.08)                            | 1.01 (0.94, 1.08)                             |               |
| ≥15.0%                               | 1.09 (1.01, 1.19)                            | 1.09 (0.99, 1.20)                             |               |
| Total SSBs, servings                 |                                              |                                               | 0.95          |
| <1/week                              | 1.00 [reference]                             | 1.00 [reference]                              |               |
| 1/ week to <1 day                    | 0.94 (0.87, 1.00)                            | 0.93 (0.87, 0.99)                             |               |
| ≥ 1 serving/day                      | 1.13 (0.98, 1.27)                            | 1.14 (0.98, 1.32)                             |               |
| <i><b>CORONARY HEART DISEASE</b></i> |                                              |                                               |               |
| Added sugars, % EAS                  |                                              |                                               | 0.21          |
| <10%                                 | 1.00 [reference]                             | 1.00 [reference]                              |               |
| 10-14.9%                             | 1.04 (0.94, 1.15)                            | 0.99 (0.89, 1.10)                             |               |
| ≥15.0%                               | 1.27 (1.12, 1.44)                            | 1.14 (0.99, 1.32)                             |               |
| Total SSBs, servings                 |                                              |                                               | 0.80          |
| <1/week                              | 1.00 [reference]                             | 1.00 [reference]                              |               |
| 1/ week to <1 day                    | 0.91 (0.83, 1.00)                            | 0.90 (0.81, 1.00)                             |               |
| ≥ 1 serving/day                      | 1.21 (1.00, 1.46)                            | 1.13 (0.90, 1.43)                             |               |

|                               |                   |                   |             |
|-------------------------------|-------------------|-------------------|-------------|
| <b><i>HEART FAILURE</i></b>   |                   |                   |             |
| <b>Added sugars, % EAS</b>    |                   |                   | <b>0.15</b> |
| <10%                          | 1.00 [reference]  | 1.00 [reference]  |             |
| 10-14.9%                      | 0.89 (0.75, 1.06) | 1.05 (0.85, 1.29) |             |
| ≥15.0%                        | 0.89 (0.71, 1.11) | 1.22 (0.91, 1.62) |             |
| <b>Total SSBs, servings</b>   |                   |                   | <b>0.15</b> |
| <1/week                       | 1.00 [reference]  | 1.00 [reference]  |             |
| 1/ week to <1 day             | 0.98 (0.83, 1.15) | 1.11 (0.90, 1.37) |             |
| ≥ 1 serving/day               | 1.16 (0.84, 1.62) | 1.76 (1.14, 2.71) |             |
| <b><i>TOTAL STROKE</i></b>    |                   |                   |             |
| <b>Added sugars, % EAS</b>    |                   |                   | <b>0.58</b> |
| <10%                          | 1.00 [reference]  | 1.00 [reference]  |             |
| 10-14.9%                      | 0.97 (0.87, 1.08) | 0.99 (0.88, 1.11) |             |
| ≥15.0%                        | 1.05 (0.91, 1.21) | 0.95 (0.81, 1.11) |             |
| <b>Total SSBs, servings</b>   |                   |                   | <b>0.86</b> |
| <1/week                       | 1.00 [reference]  | 1.00 [reference]  |             |
| 1/ week to <1 day             | 0.95 (0.86, 1.05) | 0.90 (0.81, 1.00) |             |
| ≥ 1 serving/day               | 1.10 (0.90, 1.36) | 1.00 (0.78, 1.29) |             |
| <b><i>ISCHEMIC STROKE</i></b> |                   |                   |             |
| <b>Added sugars, % EAS</b>    |                   |                   | <b>0.52</b> |
| <10%                          | 1.00 [reference]  | 1.00 [reference]  |             |
| 10-14.9%                      | 0.92 (0.81, 1.05) | 0.89 (0.78, 1.02) |             |
| ≥15.0%                        | 1.02 (0.86, 1.20) | 0.89 (0.74, 1.06) |             |
| <b>Total SSBs, servings</b>   |                   |                   |             |

|                                  |                   |                   |      |
|----------------------------------|-------------------|-------------------|------|
| <1/week                          | 1.00 [reference]  | 1.00 [reference]  | 0.88 |
| 1/ week to <1 day                | 0.97 (0.86, 1.09) | 0.90 (0.79, 1.02) |      |
| ≥ 1 serving/day                  | 1.12 (0.88, 1.42) | 1.04 (0.78, 1.38) |      |
| <b><i>HEMORRHAGIC STROKE</i></b> |                   |                   |      |
| <b>Added sugars, % EAS</b>       |                   |                   | 0.72 |
| <10%                             | 1.00 [reference]  | 1.00 [reference]  |      |
| 10-14.9%                         | 1.20 (0.91, 1.59) | 1.28 (0.96, 1.70) |      |
| ≥15.0%                           | 1.40 (0.98, 1.99) | 1.09 (0.73, 1.64) |      |
| <b>Total SSBs, servings</b>      |                   |                   | 0.86 |
| <1/week                          | 1.00 [reference]  | 1.00 [reference]  |      |
| 1/ week to <1 day                | 1.01 (0.77, 1.32) | 0.87 (0.66, 1.15) |      |
| ≥ 1 serving/day                  | 1.32 (0.79, 2.21) | 1.09 (0.60, 1.99) |      |

Abbreviations: CT=clinical trial; %EAS=percent energy from added sugar; HR, hazard ratio; OS=observational study; SSB=sugar sweetened beverages. Under/over energy reporters and those with baseline CVD, diabetes and cancer were excluded from the analysis.

\*Model 1 adjusted for age, region, smoking, study arm, ethnicity, education, marital status, BMI, physical activity, alcohol intake, energy intake, hypertension status, family history of CVD, family history of diabetes, hormone therapy use, cholesterol-lowering medication use, total protein intake, saturated fat intake, trans fat intake, fiber intake

**Table S5. Subgroup Analyses for ASB servings and CVD outcomes by baseline physical activity among 52,754 Participants in the Women's Health Initiative (OS) (1993-2021)**

| HR (95% CIs)                               | Physical activity category                   |                                              | P for interaction |
|--------------------------------------------|----------------------------------------------|----------------------------------------------|-------------------|
|                                            | ≤median<br>(8.75 MET-hours/wk)<br>(n=20,058) | >median<br>(8.75 MET-hours/wk)<br>(n=26,234) |                   |
|                                            |                                              |                                              |                   |
| <b><i>TOTAL CARDIOVASCULAR DISEASE</i></b> |                                              |                                              | 0.19              |
| <1/week                                    | 1.00 [reference]                             | 1.00 [reference]                             |                   |
| 1/ week to <1 day                          | 0.99 (0.87, 1.12)                            | 0.95 (0.85, 1.06)                            |                   |
| ≥ 1 serving/day                            | 1.22 (1.06, 1.40)                            | 1.07 (0.92, 1.24)                            |                   |
| <b><i>CORONARY HEART DISEASE</i></b>       |                                              |                                              | 0.74              |
| <1/week                                    | 1.00 [reference]                             | 1.00 [reference]                             |                   |
| 1/ week to <1 day                          | 1.07 (0.87, 1.29)                            | 0.88 (0.74, 1.07)                            |                   |
| ≥ 1 serving/day                            | 1.16 (0.92, 1.47)                            | 1.08 (0.85, 1.36)                            |                   |
| <b><i>HEART FAILURE</i></b>                |                                              |                                              | 0.83              |
| <1/week                                    | 1.00 [reference]                             | 1.00 [reference]                             |                   |
| 1/ week to <1 day                          | 0.89 (0.67, 1.20)                            | 0.92 (0.66, 1.27)                            |                   |
| ≥ 1 serving/day                            | 0.99 (0.69, 1.43)                            | 0.93 (0.59, 1.47)                            |                   |
| <b><i>TOTAL STROKE</i></b>                 |                                              |                                              | 0.14              |
| <1/week                                    | 1.00 [reference]                             | 1.00 [reference]                             |                   |
| 1/ week to <1 day                          | 0.88 (0.72, 1.09)                            | 1.08 (0.90, 1.30)                            |                   |
| ≥ 1 serving/day                            | 1.37 (1.08, 1.74)                            | 1.12 (0.86, 1.45)                            |                   |
| <b><i>ISCHEMIC STROKE</i></b>              |                                              |                                              | 0.13              |
| <1/week                                    | 1.00 [reference]                             | 1.00 [reference]                             |                   |

|                           |                   |                   |
|---------------------------|-------------------|-------------------|
| 1/ week to <1 day         | 0.94 (0.74, 1.19) | 1.02 (0.83, 1.26) |
| ≥ 1 serving/day           | 1.31 (0.99, 1.73) | 1.04 (0.77, 1.40) |
| <b>HEMORRHAGIC STROKE</b> |                   | 0.96              |
| <1/week                   | 1.00 [reference]  | 1.00 [reference]  |
| 1/ week to <1 day         | 0.86 (0.51, 1.45) | 1.34 (0.84, 2.14) |
| ≥ 1 serving/day           | 1.32 (0.73, 2.40) | 1.29 (0.68, 2.49) |

Abbreviations: ASBs, artificially sweetened beverages; HR, hazard ratio; OS=observational study. Under/over energy reporters and those with baseline CVD, diabetes and cancer were excluded from the analysis. Total CVD is a composite of incidence and death of CHD, stroke, heart failure and coronary revascularization (CABG or PTCA).

\*Model adjusted for age, region, smoking, ethnicity, education, marital status, BMI, physical activity, alcohol intake, energy intake, hypertension status, family history of CVD, family history of diabetes, hormone therapy use, cholesterol-lowering medication use, total protein intake, saturated fat intake, trans fat intake, fiber intake

**Table S6. Sensitivity Analyses for Added Sugars and Total SSBs and Total Cardiovascular Disease, Coronary Heart Disease and Heart Failure among Participants in the Women's Health Initiative (CT+OS) (1993-2021)**

|                                            | <i>1. OS participants only<br/>(n=52,754)</i> |         | <i>2. Removing diagnosis in first 3<br/>years</i> |         |
|--------------------------------------------|-----------------------------------------------|---------|---------------------------------------------------|---------|
|                                            | HR (95% CI)                                   | P value | HR (95% CI)                                       | P value |
| <b><i>TOTAL CARDIOVASCULAR DISEASE</i></b> |                                               |         |                                                   |         |
| <b>%EAS</b>                                |                                               |         |                                                   |         |
| <10%                                       | 1.00 [reference]                              |         | 1.00 [reference]                                  |         |
| 10-14.9%                                   | 1.01 (0.95, 1.08)                             | 0.69    | 1.02 (0.97, 1.08)                                 | 0.39    |
| ≥15.0%                                     | 1.11 (1.01, 1.21)                             | 0.03    | 1.05 (0.98, 1.12)                                 | 0.16    |
| <b>Total SSBs</b>                          |                                               |         |                                                   |         |
| <1/week                                    | 1.00 [reference]                              |         | 1.00 [reference]                                  |         |
| 1/ week to <1 day                          | 1.00 (0.93, 1.07)                             | 0.98    | 1.01 (0.96, 1.06)                                 | 0.66    |
| ≥ 1 serving/day                            | 1.34 (1.19, 1.52)                             | <0.001  | 1.24 (1.11, 1.37)                                 | <0.001  |
| <b><i>CORONARY HEART DISEASE</i></b>       |                                               |         |                                                   |         |
| <b>%EAS</b>                                |                                               |         |                                                   |         |
| <10%                                       | 1.00 [reference]                              |         | 1.00 [reference]                                  |         |
| 10-14.9%                                   | 1.02 (0.91, 1.14)                             | 0.71    | 1.03 (0.96, 1.12)                                 | 0.39    |
| ≥15.0%                                     | 1.18 (1.02, 1.36)                             | 0.02    | 1.17 (1.05, 1.30)                                 | 0.002   |
| <b>Total SSBs</b>                          |                                               |         |                                                   |         |
| <1/week                                    | 1.00 [reference]                              |         | 1.00 [reference]                                  |         |
| 1/ week to <1 day                          | 0.99 (0.88, 1.11)                             | 0.88    | 0.98 (0.91, 1.06)                                 | 0.61    |
| ≥ 1 serving/day                            | 1.40 (1.15, 1.71)                             | 0.001   | 1.35 (1.15, 1.58)                                 | <0.001  |

| <b>HEART FAILURE</b> |                   |       |                   |      |
|----------------------|-------------------|-------|-------------------|------|
| <b>%EAS</b>          |                   |       |                   |      |
| <10%                 | 1.00 [reference]  |       | 1.00 [reference]  |      |
| 10-14.9%             | 0.91 (0.76, 1.10) | 0.35  | 0.96 (0.82, 1.12) | 0.64 |
| ≥15.0%               | 1.08 (0.86, 1.38) | 0.48  | 0.88 (0.71, 1.08) | 0.24 |
| <b>Total SSBs</b>    |                   |       |                   |      |
| <1/week              | 1.00 [reference]  |       | 1.00 [reference]  |      |
| 1/ week to <1 day    | 1.10 (0.90, 1.34) | 0.35  | 1.09 (0.93, 1.27) | 0.70 |
| ≥ 1 serving/day      | 1.58 (1.13, 2.20) | 0.006 | 1.18 (0.85 1.62)  | 0.32 |

Abbreviations: CHD=coronary heart disease; CT=clinical trial; CVD, cardiovascular disease; %EAS=percent energy from added sugar; HF=heart failure; HR, hazard ratio; OS=observational study; SSB=sugar sweetened beverages. Under/over energy reporters and those with baseline CVD, diabetes and cancer were excluded from the analysis.

Total CVD is a composite of incidence and death of CHD, stroke, heart failure and coronary revascularization (CABG or PTCA).

Results are for model 3, adjusted for age, region, smoking, study arm (except sensitivity analysis 1), ethnicity, education, marital status, BMI, physical activity, alcohol intake, energy intake, hypertension status, family history of CVD, family history of diabetes, hormone therapy use, cholesterol-lowering medication use, total protein intake, saturated fat intake, trans fat intake, and fiber intake.

**Table S7. Sensitivity Analyses for Added Sugars and Total SSBs and Total Stroke and Stroke Subtypes among Participants in the Women's Health Initiative (CT+OS) (1993-2021)**

|                               | <i>1. OS participants only<br/>(n=52,754)</i> |         | <i>2. Removing diagnosis in first 3<br/>years</i> |         |
|-------------------------------|-----------------------------------------------|---------|---------------------------------------------------|---------|
|                               | HR (95% CI)                                   | P value | HR (95% CI)                                       | P value |
| <b><i>TOTAL STROKE</i></b>    |                                               |         |                                                   |         |
| <b>%EAS</b>                   |                                               |         |                                                   |         |
| <10%                          | 1.00 [reference]                              |         | 1.00 [reference]                                  |         |
| 10-14.9%                      | 0.98 (0.87, 1.10)                             | 0.73    | 0.97 (0.89, 1.06)                                 | 0.51    |
| ≥15.0%                        | 1.03 (0.89, 1.21)                             | 0.64    | 0.97 (0.87, 1.09)                                 | 0.61    |
| <b>Total SSBs</b>             |                                               |         |                                                   |         |
| <1/week                       | 1.00 [reference]                              |         | 1.00 [reference]                                  |         |
| 1/ week to <1 day             | 0.97 (0.86, 1.10)                             | 0.66    | 1.03 (0.95, 1.12)                                 | 0.43    |
| ≥ 1 serving/day               | 1.32 (1.07, 1.63)                             | 0.009   | 1.27 (1.06, 1.51)                                 | 0.008   |
| <b><i>ISCHEMIC STROKE</i></b> |                                               |         |                                                   |         |
| <b>%EAS</b>                   |                                               |         |                                                   |         |
| <10%                          | 1.00 [reference]                              |         | 1.00 [reference]                                  |         |
| 10-14.9%                      | 0.92 (0.81, 1.06)                             | 0.26    | 0.91 (0.83, 1.01)                                 | 0.07    |
| ≥15.0%                        | 0.93 (0.77, 1.11)                             | 0.42    | 0.94 (0.82, 1.07)                                 | 0.37    |
| <b>Total SSBs</b>             |                                               |         |                                                   |         |
| <1/week                       | 1.00 [reference]                              |         | 1.00 [reference]                                  |         |
| 1/ week to <1 day             | 0.98 (0.85, 1.14)                             | 0.82    | 1.00 (0.82, 1.22)                                 | 0.98    |
| ≥ 1 serving/day               | 1.32 (1.03, 1.68)                             | 0.02    | 1.37 (0.92, 2.05)                                 | 0.12    |



| <b>HEMORRHAGIC STROKE</b> |                   |      |                   |      |
|---------------------------|-------------------|------|-------------------|------|
| <b>%EAS</b>               |                   |      |                   |      |
| <10%                      | 1.00 [reference]  |      | 1.00 [reference]  |      |
| 10-14.9%                  | 1.27 (0.95, 1.70) | 0.11 | 1.20 (0.96, 1.49) | 0.10 |
| ≥15.0%                    | 1.54 (1.06, 2.22) | 0.02 | 1.11 (0.82, 1.49) | 0.50 |
| <b>Total SSBs</b>         |                   |      |                   |      |
| <1/week                   | 1.00 [reference]  |      | 1.00 [reference]  |      |
| 1/ week to <1 day         | 0.99 (0.73, 1.34) | 0.94 | 1.00 (0.81, 1.24) | 0.99 |
| ≥ 1 serving/day           | 1.57 (0.94, 2.60) | 0.08 | 1.58 (1.03, 2.43) | 0.04 |

Abbreviations: CHD=coronary heart disease; CT=clinical trial; CVD, cardiovascular disease; %EAS=percent energy from added sugar; HF=heart failure; HR, hazard ratio; OS=observational study; SSB=sugar sweetened beverages. Under/over energy reporters and those with baseline CVD, diabetes and cancer were excluded from the analysis.

Total CVD is a composite of incidence and death of CHD, stroke, heart failure and coronary revascularization (CABG or PTCA).

Results are for model 3, adjusted for age, region, smoking, study arm (except sensitivity analysis 1), ethnicity, education, marital status, BMI, physical activity, alcohol intake, energy intake, hypertension status, family history of CVD, family history of diabetes, hormone therapy use, cholesterol-lowering medication use, total protein intake, saturated fat intake, trans fat intake, and fiber intake.

**Table S8. Sensitivity analyses for ASBs with Risk of Cardiovascular Disease Outcomes among 52,754 Participants in the Women's Health Initiative (OS) (1993-2021)**

|                                      | <b>Removing diagnoses in first 3 years</b> |                |
|--------------------------------------|--------------------------------------------|----------------|
| <b><i>CARDIOVASCULAR DISEASE</i></b> | HR (95% CI)                                | <i>P</i> value |
| <1/week                              | 1.00 [reference]                           |                |
| 1/ week to <1 day                    | 0.96 (0.88, 1.05)                          | 0.39           |
| ≥ 1 serving/day                      | 1.10 (0.98, 1.23)                          | 0.08           |
| <b><i>CORONARY HEART DISEASE</i></b> |                                            |                |
| <1/week                              | 1.00 [reference]                           |                |
| 1/ week to <1 day                    | 0.97 (0.85, 1.11)                          | 0.67           |
| ≥ 1 serving/day                      | 1.10 (0.93, 1.31)                          | 0.27           |
| <b><i>HEART FAILURE</i></b>          |                                            |                |
| <1/week                              | 1.00 [reference]                           |                |
| 1/ week to <1 day                    | 0.92 (0.72, 1.17)                          | 0.49           |
| ≥ 1 serving/day                      | 0.92 (0.66, 1.29)                          | 0.63           |
| <b><i>TOTAL STROKE</i></b>           |                                            |                |
| <1/week                              | 1.00 [reference]                           |                |
| 1/ week to <1 day                    | 0.97 (0.84, 1.12)                          | 0.67           |
| ≥ 1 serving/day                      | 1.14 (0.95, 1.38)                          | 0.17           |
| <b><i>ISCHEMIC STROKE</i></b>        |                                            |                |
| <1/week                              | 1.00 [reference]                           |                |
| 1/ week to <1 day                    | 1.00 (0.85, 1.18)                          | 0.99           |
| ≥ 1 serving/day                      | 1.07 (0.86, 1.33)                          | 0.55           |

| <b><i>HEMORRHAGIC STROKE</i></b> |                   |      |
|----------------------------------|-------------------|------|
| <1/week                          | 1.00 [reference]  |      |
| 1/ week to <1 day                | 0.90 (0.61, 1.31) | 0.58 |
| ≥ 1 serving/day                  | 1.14 (0.71, 1.83) | 0.60 |

Abbreviations: ASBs, artificially sweetened beverages; HR, hazard ratio; OS=observational study. Under/over energy reporters and those with baseline CVD, diabetes and cancer were excluded from the analysis. Total CVD is a composite of incidence and death of CHD, stroke, heart failure and coronary revascularization (CABG or PTCA). Models are adjusted for age, region, smoking, ethnicity, education, marital status, BMI, physical activity, alcohol intake, energy intake, hypertension status, family history of CVD, family history of diabetes, hormone therapy use, cholesterol-lowering medication use, total protein intake, saturated fat intake, trans fat intake, fiber intake.

**Table S9. Characteristics of included studies for the systematic review and meta-analysis**

| Author, year     | Country             | Cohort name                                                             | Sex   | Age at entry                                                       | Sample size | Outcome                                                      | Exposure    | Follow up years     |
|------------------|---------------------|-------------------------------------------------------------------------|-------|--------------------------------------------------------------------|-------------|--------------------------------------------------------------|-------------|---------------------|
| Fung, 2009       | USA                 | NHS                                                                     | Women | 34-59                                                              | 88,520      | CHD                                                          | SSB, ASB    | 24                  |
| Bernstein, 2012  | United States (USA) | Health Professionals Follow-Up Study (HPFS)+ Nurses' Health Study (NHS) | Both  | 34-59 (NHS), 40-75 (HPFS)                                          | 127,456     | Stroke                                                       | SSB, ASB    | 22 (HPFS), 28 (NHS) |
| de Koning, 2012  | USA                 | HPFS                                                                    | Men   | 40-75                                                              | 42,883      | Coronary heart disease (CHD)                                 | SSB, ASB    | 22                  |
| Eshak, 2012      | Japan               | Japan Public Health Centre--based prospective                           | Both  | 40-59                                                              | 39,786      | CHD, Stroke                                                  | SSB         | 18                  |
| Gardener, 2012   | USA                 | Northern Manhattan Study                                                | Men   | ~69                                                                | 2,564       | CVD incidence, CVD death, myocardial infraction (MI), Stroke | SSB, ASB    | 10                  |
| Larsson, 2014    | Sweden              | Cohort of Swedish Men + Swedish Mammography Cohort                      | Both  | 45-79 (Cohort of Swedish Men) + 49-83 (Swedish Mammography Cohort) | 68,459      | Stroke                                                       | SSB         | 10.3                |
| Tasevska, 2014   | USA                 | NIH-AARP Diet and Health Study                                          | Both  | 50-71                                                              | 353,751     | CVD mortality                                                | Added Sugar | up to 13            |
| Yang, 2014       | USA                 | National Health and Nutrition Examination Survey III (1988-1994)        | Both  | ≥20                                                                | 11,733      | CVD mortality                                                | Added Sugar | 14.6                |
| Sonested, 2015   | Sweden              | Malmö Diet and Cancer Study cohort                                      | Both  | 44-74                                                              | 26,445      | CVD incidence, CHD, Stroke                                   | SSB         | 14                  |
| Odegaard, 2015   | Singapore           | Singapore Chinese Health Study                                          | Both  | 45-74                                                              | 52,584      | CVD mortality                                                | SSB         | 16.3                |
| Barrington, 2016 | USA                 | Vitamins and Lifestyle study                                            | Both  | 50-76                                                              | 69,582      | CVD mortality                                                | SSB         | 6.9                 |

|               |                        |                                                              |       |                        |                                |                           |                       |      |
|---------------|------------------------|--------------------------------------------------------------|-------|------------------------|--------------------------------|---------------------------|-----------------------|------|
| Pase, 2017    | USA                    | Framingham Heart Study                                       | Both  | ≥45                    | 2,888                          | Stroke                    | SSB, ASB              | 10   |
| Liu, 2018     | Hong Kong              | Mr and Ms Osteoporosis of Hong Kong                          | Both  | ≥65                    | 3,416                          | CVD mortality             | Added Sugar           | 11.1 |
| Collin, 2019  | USA                    | Geographic and Racial Differences in Stroke study            | Both  | ≥45                    | 13,440                         | CHD                       | SSB                   | 6    |
| Malik 2019    | USA                    | NHS+HPFS                                                     | Both  | 30–55(NHS)+40–75(HPFS) | 116,383                        | CVD mortality             | SSB, ASB              | 34   |
| Mulle, 2019   | Ten European countries | European Prospective Investigation into Cancer and Nutrition | Both  | 50.8                   | 451,743                        | CVD mortality             | SSB, ASB              | 16.4 |
| Ramne, 2019   | Swedish                | Malmö Diet and Cancer Study                                  | Both  | 44–73                  | 24,272                         | CVD mortality             | Added Sugar           | ~20  |
| Janzi, 2020   | Sweden                 | Malmö Diet and Cancer Study cohort                           | Both  | 44-74                  | 25,877                         | Stroke, CHD               | Added sugar, SSB      | 19.5 |
| Pacheco, 2020 | USA                    | California Teachers Study                                    | Women | 52.1±13.4              | 106,178                        | CVD incidence, MI, Stroke | SSB                   | 20   |
| Zhang, 2020   | USA                    | National Health and Nutrition Examination Survey 1999-2014   | Both  | ≥20                    | 31,402                         | CVD mortality             | Added Sugar, SSB, ASB | 7.9  |
| Huang, 2021   | Japan                  | Japan Public Health Centre–based prospective                 | Both  | 45-74                  | 70486 (7,118 men, 4,693 women) | CVD incidence, stroke     | SSB                   | 17.1 |

**Table S10. Quality of included studies assessed by NOS scale and AHRQ standards**

| Author, year     | Selection | Comparability | Outcome | Total NOS Score | AHRQ Standards |
|------------------|-----------|---------------|---------|-----------------|----------------|
| Fung, 2009       | 3         | 2             | 2       | 7               | good           |
| Bernstein, 2012  | 2         | 1             | 3       | 6               | fair           |
| de Koning, 2012  | 3         | 2             | 3       | 8               | good           |
| Eshak, 2012      | 3         | 2             | 3       | 8               | good           |
| Gardener, 2012   | 4         | 2             | 3       | 9               | good           |
| Larsson, 2014    | 3         | 2             | 2       | 7               | good           |
| Tasevska, 2014   | 3         | 2             | 2       | 7               | good           |
| Yang, 2014       | 4         | 2             | 2       | 8               | good           |
| Sonested, 2015   | 3         | 2             | 2       | 7               | good           |
| Odegaard, 2015   | 4         | 2             | 3       | 9               | good           |
| Barrington, 2016 | 3         | 2             | 3       | 8               | good           |
| Pase, 2017       | 3         | 2             | 2       | 7               | good           |
| Liu, 2018        | 3         | 2             | 3       | 8               | good           |
| Collin, 2019     | 3         | 2             | 3       | 8               | good           |
| Malik 2019       | 3         | 2             | 3       | 8               | good           |
| Mullee, 2019     | 4         | 2             | 3       | 9               | good           |
| Ramne, 2019      | 3         | 2             | 2       | 7               | good           |
| Janzi, 2020      | 4         | 2             | 3       | 9               | good           |
| Pacheco, 2020    | 3         | 2             | 2       | 7               | good           |
| Zhang, 2020      | 4         | 2             | 2       | 8               | good           |
| Huang, 2021      | 4         | 2             | 3       | 9               | good           |

**Abbreviations:** AHRQ, the Agency for Healthcare Research and Quality; NOS, Newcastle-Ottawa Scale.

**Table S11. Subgroup analyses for added Sugar, SSB, ASB, and cardiovascular outcomes by sex category in the random effects network meta-analysis**

| Sex category                           |                     |                   |                      |
|----------------------------------------|---------------------|-------------------|----------------------|
| RR (95% CIs)                           | Men only<br>(n=24)  |                   | Women only<br>(n=28) |
| <b>INCIDENT CARDIOVASCULAR DISEASE</b> |                     |                   |                      |
| Lowest exposure                        | 1.00 [reference]    | Lowest exposure   | 1.00 [reference]     |
| Added sugar (n=0)                      | NA                  | Added sugar (n=1) | 1.08 (1.00, 1.16) *  |
| SSB (n=1)                              | 1.09 (0.82, 1.45)   | SSB (n=2)         | 1.25 (1.15, 1.35) *  |
| ASB (n=1)                              | 1.44 (1.02, 2.03) * | ASB (n=1)         | 1.14 (1.03, 1.27) *  |
| <b>CARDIOVASCULAR MORTALITY</b>        |                     |                   |                      |
| Lowest exposure                        | 1.00 [reference]    | Lowest exposure   | 1.00 [reference]     |
| Added sugar (n=3)                      | 0.92 (0.73, 1.15)   | Added sugar (n=3) | 1.17 (0.80, 1.71)    |
| SSB (n=4)                              | 1.17 (0.99, 1.38)   | SSB (n=3)         | 1.34 (1.01, 1.77) *  |
| ASB (n=3)                              | 1.25 (1.03, 1.51) * | ASB (n=2)         | 1.30 (0.94, 1.80)    |
| <b>CORONARY HEART DISEASE</b>          |                     |                   |                      |
| Lowest exposure                        | 1.00 [reference]    | Lowest exposure   | 1.00 [reference]     |
| Added sugar (n=0)                      | NA                  | Added sugar (n=1) | 1.20 (1.09, 1.32) *  |
| SSB (n=3)                              | 1.13 (0.92, 1.38)   | SSB (n=4)         | 1.30 (1.17, 1.45) *  |
| ASB (n=2)                              | 1.07 (0.85, 1.34)   | ASB (n=2)         | 1.13 (1.01, 1.28) *  |
| <b>STROKE</b>                          |                     |                   |                      |
| Lowest exposure                        | 1.00 [reference]    | Lowest exposure   | 1.00 [reference]     |
| Added sugar (n=0)                      | NA                  | Added sugar (n=1) | 0.99 (0.89, 1.10)    |
| SSB (n=4)                              | 1.02 (0.83, 1.25)   | SSB (n=5)         | 1.22 (1.12, 1.32) *  |
| ASB (n=2)                              | 1.13 (0.83, 1.54)   | ASB (n=2)         | 1.19 (1.08, 1.31) *  |

**Abbreviations:** ASB, artificial sweetened beverages; RR, relative risk; SSB, sugar sweetened beverage

**Table S12. Sensitivity analyses for added Sugar, SSB, ASB, and cardiovascular outcomes in the random effects network meta-analysis**

| RR (95% CIs)                                  |                                              |                                                    |                                                  |
|-----------------------------------------------|----------------------------------------------|----------------------------------------------------|--------------------------------------------------|
| <b><i>INCIDENT CARDIOVASCULAR DISEASE</i></b> |                                              |                                                    |                                                  |
|                                               | 1. Excluding the present study (SSB)         | 2. Excluding 1 & Sonestedt 2015 (SSB)              | 3. Excluding 2 & the present study (added sugar) |
| <b>Lowest exposure</b>                        | 1.00 [reference]                             | 1.00 [reference]                                   | 1.00 [reference]                                 |
| <b>Added sugar</b>                            | 1.08 (0.89, 1.31)                            | 1.08 (1.01, 1.15)                                  | NA                                               |
| <b>SSB</b>                                    | 1.09 (0.95, 1.25)                            | 1.18 (1.05, 1.31)                                  | 1.18 (1.05, 1.31)                                |
| <b>ASB</b>                                    | 1.20 (1.00, 1.44)                            | 1.16 (1.06, 1.28)                                  | 1.16 (1.06, 1.28)                                |
| <b>I-squared</b>                              | 53.5% (0.0, 84.6)                            | 0.0% (0.0, 89.6)                                   | 0.0% (0.0, 89.6)                                 |
| <b><i>CARDIOVASCULAR MORTALITY</i></b>        |                                              |                                                    |                                                  |
|                                               | 1. Excluding Tasevska 2014.men (added sugar) | 2. Excluding 1 & Tasevska 2014.women (added sugar) | 3. Excluding 2 & Mullee 2019.men (ASB)           |
| <b>Lowest exposure</b>                        | 1.00 [reference]                             | 1.00 [reference]                                   | 1.00 [reference]                                 |
| <b>Added sugar</b>                            | 1.23 (1.01, 1.50)                            | 1.45 (1.15, 1.82)                                  | 1.45 (1.16, 1.81)                                |
| <b>SSB</b>                                    | 1.21 (1.07, 1.37)                            | 1.21 (1.09, 1.34)                                  | 1.21 (1.09, 1.33)                                |
| <b>ASB</b>                                    | 1.26 (1.07, 1.47)                            | 1.25 (1.09, 1.43)                                  | 1.19 (1.04, 1.38)                                |
| <b>I-squared</b>                              | 59.0% (33.7, 74.7)                           | 45.7% (8.3, 67.9)                                  | 40.1% (0.0, 65.3)                                |
| <b><i>CORONARY HEART DISEASE</i></b>          |                                              |                                                    |                                                  |
|                                               | 1. Excluding de Koning 2012 (ASB)            | 2. Excluding 1 & the present study (SSB)           | 3. Excluding 2 & Sonestedt 2015 (SSB)            |
| <b>Lowest exposure</b>                        | 1.00 [reference]                             | 1.00 [reference]                                   | 1.00 [reference]                                 |
| <b>Added sugar</b>                            | 1.21 (1.05, 1.40)                            | 1.21 (1.10, 1.33)                                  | 1.21 (1.10, 1.32)                                |
| <b>SSB</b>                                    | 1.17 (1.07, 1.27)                            | 1.13 (1.05, 1.21)                                  | 1.17 (1.08, 1.27)                                |
| <b>ASB</b>                                    | 1.13 (0.98, 1.32)                            | 1.13 (1.00, 1.28)                                  | 1.13 (1.01, 1.28)                                |
| <b>I-squared</b>                              | 29.4% (0.0, 66.2)                            | 2.7% (0.0, 65.7)                                   | 0.0% (0.0, 67.6)                                 |
| <b><i>STROKE</i></b>                          |                                              |                                                    |                                                  |
|                                               | 1. Excluding the present study (added sugar) | 2. Excluding 1 & Eshak 2012.men (SSB)              | 3. Excluding 2 & Sonestedt 2015 (SSB)            |
| <b>Lowest exposure</b>                        | 1.00 [reference]                             | 1.00 [reference]                                   | 1.00 [reference]                                 |



|                    |                   |                   |                   |
|--------------------|-------------------|-------------------|-------------------|
| <b>Added sugar</b> | 1.57 (1.09, 2.26) | 1.57 (1.12, 2.19) | 1.57 (1.12, 2.19) |
| <b>SSB</b>         | 1.13 (1.05, 1.22) | 1.16 (1.09, 1.24) | 1.20 (1.12, 1.28) |
| <b>ASB</b>         | 1.18 (1.05, 1.33) | 1.18 (1.08, 1.28) | 1.18 (1.08, 1.28) |
| <b>I-squared</b>   | 31.0% (0.0, 62.2) | 0.0% (0.0, 53.6)  | 0.0% (0.0, 55.0)  |

**Abbreviations:** ASB, artificial sweetened beverages; RR, relative risk; SSB, sugar sweetened beverages.

Top three studies causing most significant changes to I-squared in the leave-one-out meta-analysis were excluded stepwise in the sensitivity analysis

**Figure S1. Flow chart for the literature search**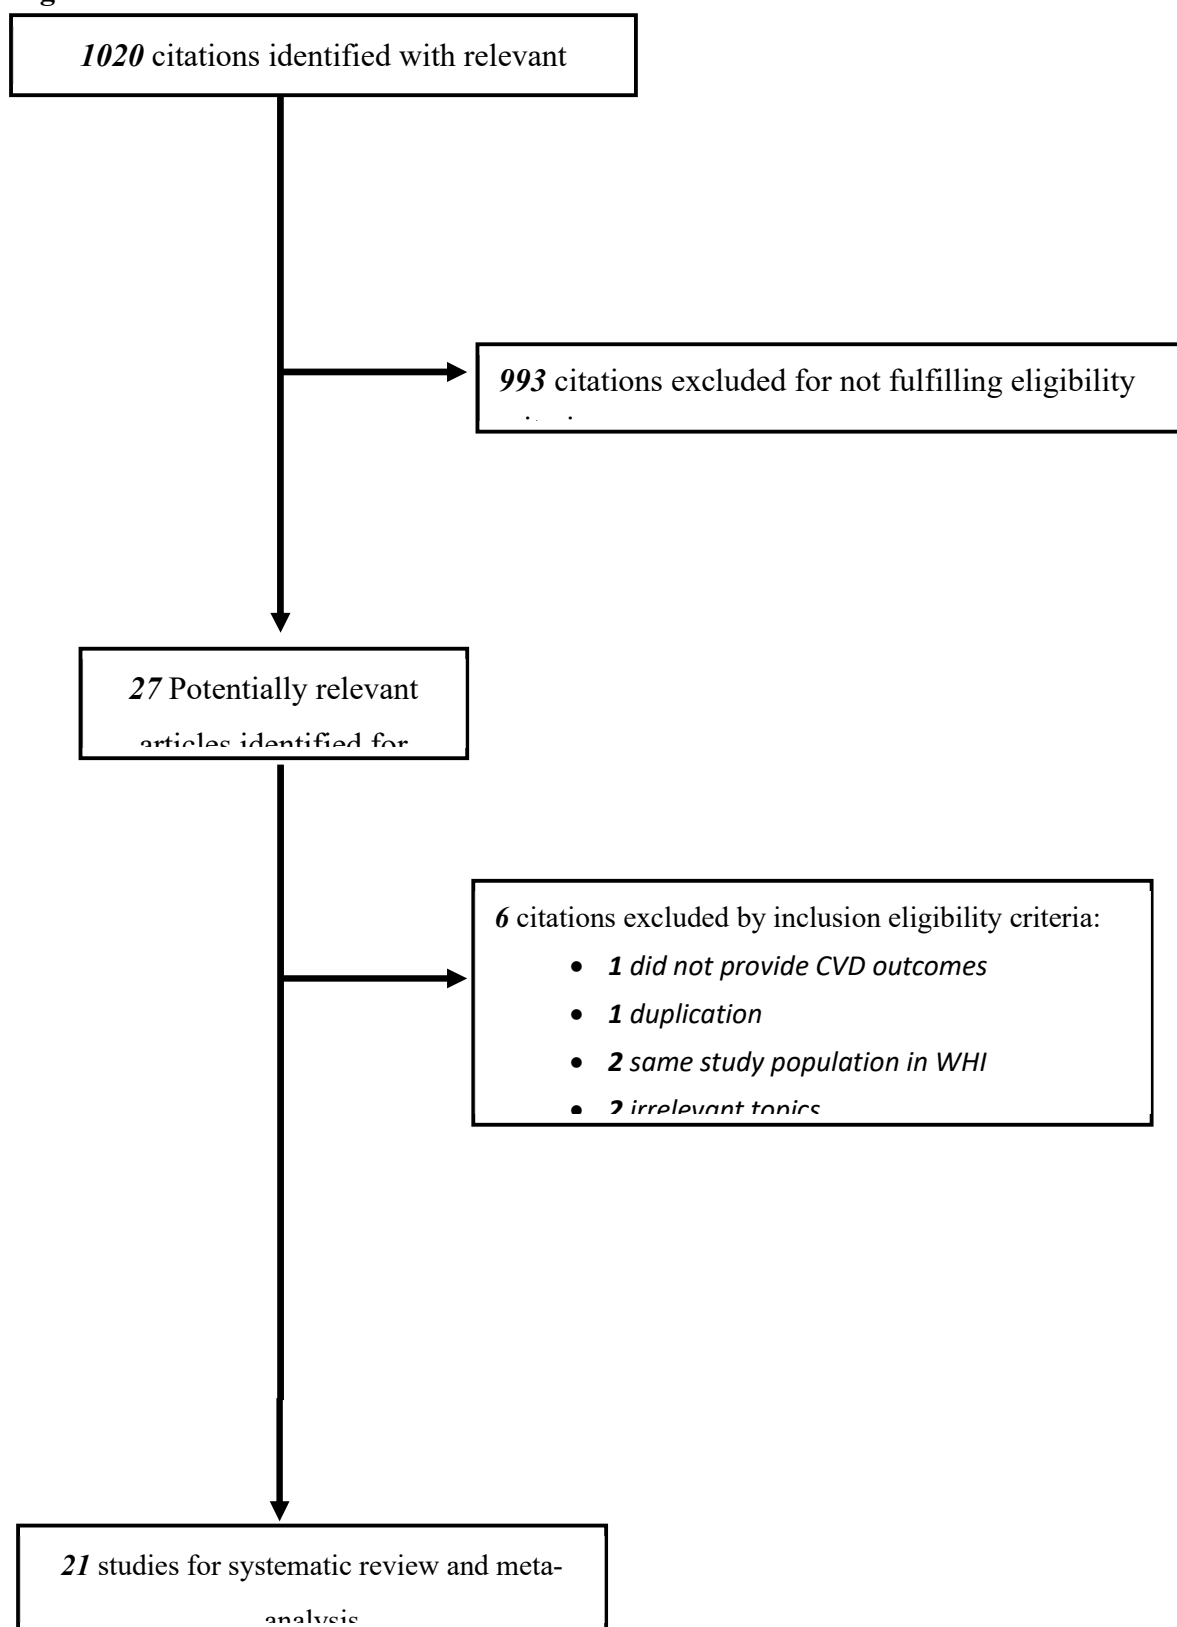

**Figure S2. Plot of the added sugar, ASB, SSB, and CVD outcomes network**

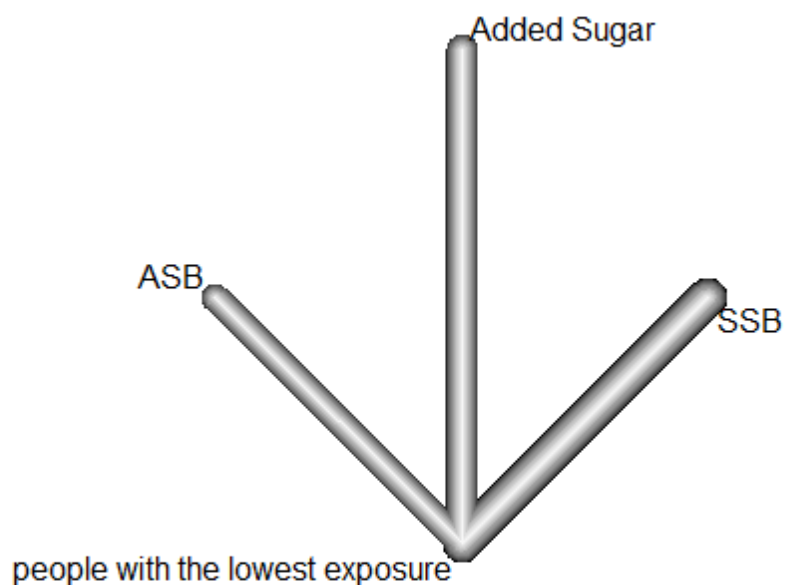

The network graph was generated based on the random effects network meta-analysis on added sugar, ASB, SSB, and CVD outcomes. Thicker lines indicating more publications included in the analysis (Added sugar, 13 records; ASB, 17 records; SSB, 38 records).

**Abbreviations:** ASB: artificially sweetened beverages; SSB: sugar-sweetened beverages
